# Supplementary material for: Systematic Analysis of a Novel Human Renal Glomerulus-Enriched Gene Expression Dataset
Source: PubMed Central journal article supplement (PMC2902524; doi:10.1371/journal.pone.0011545), 2010-07-12
Supplement: pone.0011545.s001.pdf [file pone.0011545.s001.pdf]

**Figure S1**

| Entrez Gene | Gene Symbol | AC1 | AC2 | AC3 | AC4 | AC5 | AC6 | AC7 | AC8 | AC9 | AC10 |
|-------------|-------------|-----|-----|-----|-----|-----|-----|-----|-----|-----|------|
| 29          | ABR         |     |     | ■   |     |     |     |     |     |     |      |
| 134         | ADORA1      |     |     | ■   | ■   |     | ■   |     |     | ■   |      |
| 375790      | AGRN        |     | ■   |     |     | ■   |     |     |     |     |      |
| 7840        | ALMS1       |     | ■   |     |     | ■   |     |     |     |     |      |
| 347902      | AMIGO2      |     |     | ■   |     |     |     |     |     | ■   |      |
| 301         | ANXA1       |     |     |     |     |     |     |     |     | ■   |      |
| 302         | ANXA2       | ■   |     |     |     |     |     |     |     |     |      |
| 304         | ANXA2P2     | ■   |     |     |     |     |     |     |     |     |      |
| 323         | APBB2       |     | ■   | ■   |     | ■   |     |     |     | ■   | ■    |
| 324         | APC         |     | ■   |     | ■   | ■   |     |     | ■   | ■   |      |
| 23365       | ARHGEF12    |     |     | ■   |     |     |     |     |     |     |      |
| 50650       | ARHGEF3     |     |     | ■   |     |     |     |     |     |     |      |
| 440         | ASNS        |     |     | ■   |     |     |     |     |     | ■   |      |
| 472         | ATM         |     |     | ■   |     |     |     |     |     | ■   |      |
| 11041       | B3GNT1      |     | ■   |     |     | ■   |     |     |     |     |      |
| 633         | BGN         | ■   |     |     |     |     |     |     |     |     |      |
| 650         | BMP2        |     | ■   |     |     | ■   | ■   | ■   |     |     |      |
| 655         | BMP7        |     | ■   | ■   |     | ■   | ■   | ■   |     |     |      |
| 663         | BNIP2       |     | ■   | ■   |     |     |     | ■   |     | ■   |      |
| 2186        | BPTF        |     |     |     |     |     | ■   | ■   |     |     |      |
| 9044        | BTAF1       |     |     |     |     |     | ■   | ■   |     |     |      |
| 716         | C1S         |     |     |     |     | ■   | ■   |     |     |     |      |
| 857         | CAV1        | ■   |     |     |     |     | ■   | ■   | ■   |     |      |
| 972         | CD74        |     |     | ■   |     |     |     |     |     | ■   |      |
| 1027        | CDKN1B      |     |     | ■   | ■   |     | ■   |     | ■   |     |      |
| 1028        | CDKN1C      |     | ■   |     |     | ■   | ■   |     |     |     |      |
| 1952        | CELSR2      |     | ■   |     |     | ■   |     |     |     |     |      |
| 53405       | CLIC5       |     | ■   |     |     | ■   |     |     |     |     |      |
| 1281        | COL3A1      | ■   |     |     |     |     |     |     |     |     |      |
| 1285        | COL4A3      |     |     | ■   |     |     |     |     |     |     |      |
| 1490        | CTGF        | ■   |     |     |     |     |     |     |     |     |      |
| 8452        | CUL3        |     | ■   | ■   |     |     |     |     |     |     |      |
| 1627        | DBN1        |     |     |     |     | ■   |     |     |     |     |      |
| 10202       | DHRS2       |     |     | ■   |     |     |     |     |     | ■   |      |
| 9231        | DLG5        |     |     | ■   |     |     |     |     |     |     |      |
| 1756        | DMD         |     | ■   |     |     | ■   |     |     |     |     |      |
| 10049       | DNAJB6      |     |     | ■   |     |     | ■   |     |     |     |      |
| 667         | DST         |     | ■   |     |     | ■   |     |     | ■   |     |      |
| 1909        | EDNRA       | ■   |     |     |     |     | ■   | ■   |     |     |      |
| 1948        | EFNB2       | ■   |     |     |     |     | ■   | ■   |     |     |      |
| 9451        | EIF2AK3     |     |     | ■   |     |     | ■   |     |     |     |      |
| 2004        | ELK3        | ■   |     |     |     |     | ■   |     |     |     |      |

|       |        |   |   |   |   |   |   |   |   |   |
|-------|--------|---|---|---|---|---|---|---|---|---|
| 51705 | EMCN   | ■ |   |   |   |   |   |   |   |   |
| 51752 | ERAP1  | ■ |   |   |   |   |   |   |   |   |
| 2066  | ERBB4  |   |   |   | ■ |   |   |   |   |   |
| 2149  | F2R    |   |   | ■ |   |   |   |   | ■ |   |
| 2152  | F3     |   |   | ■ |   |   |   |   | ■ |   |
| 10116 | FEM1B  |   |   | ■ |   |   |   |   |   |   |
| 9638  | FEZ1   |   | ■ |   |   | ■ |   |   |   |   |
| 9637  | FEZ2   |   | ■ |   |   | ■ |   |   |   |   |
| 2246  | FGF1   | ■ |   |   |   |   |   |   |   |   |
| 2339  | FNTA   |   |   | ■ |   |   | ■ |   |   | ■ |
| 2296  | FOXC1  | ■ |   | ■ |   |   |   |   |   | ■ |
| 2534  | FYN    |   |   |   |   | ■ |   |   |   |   |
| 2619  | GAS1   |   | ■ | ■ |   | ■ |   |   |   | ■ |
| 2690  | GHR    |   |   | ■ |   |   |   |   |   |   |
| 2697  | GJA1   |   | ■ |   |   | ■ |   |   |   |   |
| 2701  | GJA4   | ■ |   |   |   |   |   |   |   |   |
| 2898  | GRIK2  |   |   | ■ |   |   |   |   |   | ■ |
| 2934  | GSN    |   |   |   |   | ■ |   |   |   |   |
| 1839  | HBEGF  |   |   |   | ■ |   | ■ |   |   |   |
| 3087  | HHEX   |   |   |   |   |   | ■ |   |   |   |
| 3198  | HOXA1  |   | ■ |   |   | ■ |   |   |   |   |
| 3399  | ID3    |   |   | ■ |   | ■ |   |   |   |   |
| 3400  | ID4    |   |   |   |   | ■ |   |   |   |   |
| 3428  | IFI16  |   |   | ■ |   |   |   |   |   |   |
| 3479  | IGF1   |   |   | ■ | ■ |   | ■ |   |   | ■ |
| 3488  | IGFBP5 |   |   |   | ■ |   | ■ |   |   |   |
| 3551  | IKBKB  |   |   | ■ |   |   |   |   |   | ■ |
| 51447 | IP6K2  |   |   | ■ |   |   |   |   |   |   |
| 3685  | ITGAV  | ■ |   |   |   |   | ■ |   |   |   |
| 3690  | ITGB3  |   |   |   | ■ |   | ■ |   |   |   |
| 3720  | JARID2 |   |   |   |   |   | ■ |   |   |   |
| 3791  | KDR    | ■ |   |   |   | ■ |   | ■ |   |   |
| 3913  | LAMB2  |   | ■ |   |   | ■ |   |   |   |   |
| 3953  | LEPR   | ■ |   |   |   |   |   |   |   |   |
| 3956  | LGALS1 |   |   | ■ |   |   |   |   |   |   |
| 4005  | LMO2   | ■ |   |   |   |   |   |   |   |   |
| 4015  | LOX    | ■ |   |   |   |   |   |   |   |   |
| 1130  | LYST   |   |   | ■ |   |   |   |   |   |   |
| 23499 | MACF1  |   | ■ |   |   | ■ |   |   | ■ |   |
| 4131  | MAP1B  |   | ■ |   |   | ■ |   |   | ■ |   |
| 4134  | MAP4   |   |   |   |   |   |   |   | ■ |   |
| 4208  | MEF2C  |   |   | ■ |   |   | ■ |   |   | ■ |
| 4212  | MEIS2  |   |   |   |   |   | ■ |   |   |   |
| 4627  | MYH9   | ■ | ■ |   |   |   |   |   |   |   |
| 4643  | MYO1E  | ■ |   |   |   |   |   |   |   |   |
| 4664  | NAB1   |   |   |   |   | ■ | ■ |   |   |   |
